# Supplementary material for: Reactive oxygen species coordinate the transcriptional responses to iron availability in Arabidopsis
Source: PubMed Central journal article supplement (PMC7966954; doi:10.1093/jxb/eraa522), 2020-11-07
Supplement: eraa522_suppl_supplementary-figures-s1-s3_and_table-s1.pdf [file eraa522_suppl_supplementary-figures-s1-s3_and_table-s1.pdf]

## Supplemental data

### Reactive Oxygen Species coordinate the transcriptional responses to iron availability in Arabidopsis

Claudia von der Mark<sup>1,2,\*</sup>, Rumen Ivanov<sup>1,\*</sup>, Monique Eutebach<sup>1</sup>, Veronica G. Maurino<sup>3</sup>, Petra Bauer<sup>1,4,†</sup> and Tzvetina Brumbarova<sup>1,†</sup>

<sup>1</sup> Institute of Botany, Heinrich Heine University, Universitätsstr. 1, 40225 Düsseldorf, Germany

<sup>2</sup> Group of Plant Vascular Development, Swiss Federal Institute of Technology (ETH) Zurich, 8092 Zurich, Switzerland

<sup>3</sup> Department of Molecular Plant Physiology, Institute of Molecular Physiology and Biotechnology of Plants, University of Bonn, Kirschalle 1, 53115 Bonn, Germany

<sup>4</sup> Cluster of Excellence on Plant Science (CEPLAS), Heinrich Heine University, 40225 Düsseldorf, Germany

\* These authors contributed equally to this work.

† Correspondence: [petra.bauer@hhu.de](mailto:petra.bauer@hhu.de), [tzvetina.brumbarova@hhu.de](mailto:tzvetina.brumbarova@hhu.de)

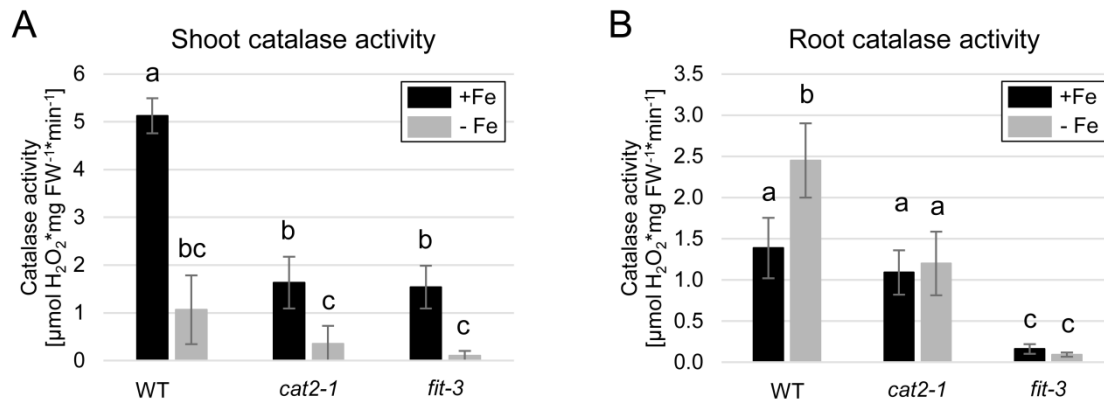

**Supplemental Fig. 1.** Catalase activity in *fit-3* mutant plants. (A) Shoot catalase activity in wild type, *cat2-1* and *fit-3* plants. (B) Catalase activity in roots of wild type, *cat2-1* and *fit-3*. Plants were grown for 10 days under sufficient (+Fe) or deficient Fe supply (-Fe). Bars represent mean values of three independent experiments  $\pm$  SD. Different letters indicate statistically significant differences ( $P < 0.05$ ).

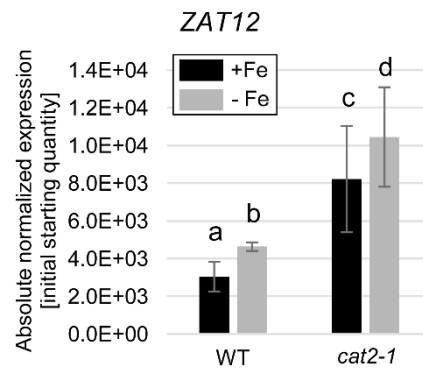

**Supplemental Fig. 2.** Regulation of the *ZAT12* gene in wild-type and *cat2-1* plants grown for 10 days under sufficient (+Fe) or deficient (-Fe) Fe supply ( $n = 3$ ). Bars represent mean values,  $\pm$  SD. Different letters indicate statistically significant differences ( $P < 0.05$ ).

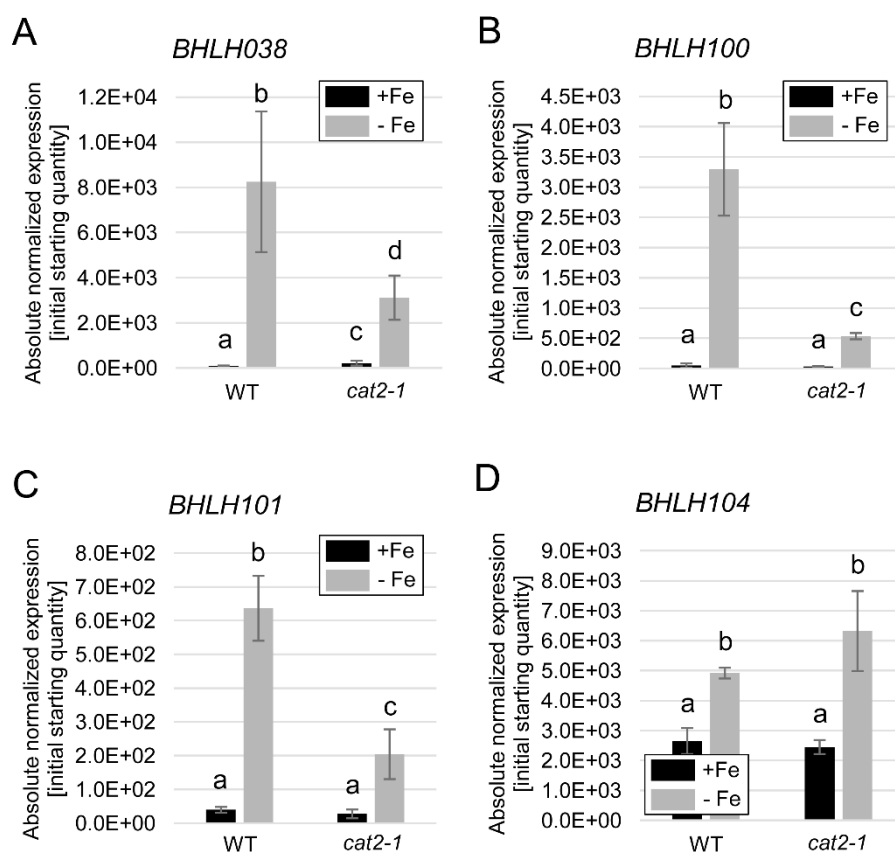

**Supplemental Fig. 3.** Regulation of Fe acquisition and homeostasis genes in response to increased  $H_2O_2$  caused by the absence of CAT2. (A-D) Gene expression of (A) *BHLH038*, (B) *BHLH100*, (C) *BHLH101* and (D) *BHLH104* in wild-type and *cat2-1* plants grown for 10 days under sufficient (+Fe) or deficient (-Fe) Fe supply (n = 3). Bars represent mean values,  $\pm$  SD. Different letters indicate statistically significant differences ( $P < 0.05$ ).

**Supplemental Table 1.** List of primers used for RT-qPCR.

| Primer name  | Primer sequence (5' to 3') | Origin                    |
|--------------|----------------------------|---------------------------|
| BHLH038 RT-F | AGCAGCAACCAAAGGCG          | Wang <i>et al.</i> (2007) |
| BHLH038 RT-R | CCACTTGAAGATGCAAAGTGTAG    | Wang <i>et al.</i> (2007) |
| BHLH039 RT-F | GACGGTTTCTCGAAGCTTG        | Wang <i>et al.</i> (2007) |
| BHLH039 RT-R | GGTGGCTGCTTAACGTAACAT      | Wang <i>et al.</i> (2007) |
| BHLH100 RT-F | AAGTCAGAGGAAGGGGTTACA      | Wang <i>et al.</i> (2007) |
| BHLH100 RT-R | GATGCATAGAGTAAAAGAGTCGCT   | Wang <i>et al.</i> (2007) |
| BHLH101 RT-F | CAGCTGAGAAACAAAGCAATG      | Wang <i>et al.</i> (2007) |
| BHLH101 RT-R | CAGTCTCACTTTGCAATCTCC      | Wang <i>et al.</i> (2007) |
| BHLH104 RT-F | GGTTGAGGAGGGAGAAGCTAAATG   | This study                |
| BHLH104 RT-R | ACGGATTGCATCATCGAGTATAGC   | This study                |
| CAT1 RT-F    | AAGTGCTTCATCGGGAAGG        | This study                |
| CAT1 RT-R    | CTCCGAAAGCGCTTCAAC         | This study                |
| CAT2 RT-F    | TGCTGGAAACTACCCTGAATGG     | This study                |
| CAT2 RT-R    | TCAACACCATACGTCCAACAGG     | This study                |
| CAT3 RT-F    | CCACTTGATGTGACCAAGATCTG    | This study                |
| CAT3 RT-R    | GTAGATTCCAGGAACCACAAGACC   | This study                |
| EFc RT-F     | TATGGGATCAAGAACTCACAAT     | Wang <i>et al.</i> (2007) |
| EFc RT-R     | CTGGATGTACTCGTTGTTAGGC     | Wang <i>et al.</i> (2007) |
| FIT RT-F     | GGAGAAGGTGTTGCTCCATC       | Wang <i>et al.</i> (2007) |
| FIT RT-R     | TCCGGAGAAGGAGAGCTTAG       | Wang <i>et al.</i> (2007) |
| FRO2 RT-F    | CTTGGTCATCTCCGTGAGC        | Wang <i>et al.</i> (2007) |
| FRO2 RT-R    | AAGATGTTGGAGATGGACGG       | Wang <i>et al.</i> (2007) |
| ILR3 RT-F    | GCATGTAGAGAGAAGCAGCGAC     | This study                |
| ILR3 RT-R    | TGCGGACAGCATCAACCAAG       | This study                |
| IRT1 RT-F    | AAGCTTTGATCACGGTTGG        | Wang <i>et al.</i> (2007) |
| IRT1 RT-R    | TTAGGTCCCATGAACTCCG        | Wang <i>et al.</i> (2007) |
| PYE RT-F     | GTTCCAGGACTTCCCATTT        | This study                |
| PYE RT-R     | GTGTCTGGGGATCAGGTTGT       | This study                |
| ZAT12 RT-F   | GAGTCACAAGAAGCCTAACCAACGA  | Le <i>et al.</i> (2016)   |
| ZAT12 RT-R   | AAGCCACTCTCTCCCACTGCTA     | Le <i>et al.</i> (2016)   |

**Supplemental References**

**Le CT, Brumbarova T, Ivanov R, Stoof C, Weber E, Mohrbacher J, Fink-Straube C, Bauer P.** 2016. ZINC FINGER OF ARABIDOPSIS THALIANA12 (ZAT12) Interacts with FER-LIKE IRON DEFICIENCY-INDUCED TRANSCRIPTION FACTOR (FIT) Linking Iron Deficiency and Oxidative Stress Responses. *Plant Physiol* **170**, 540-557.

**Wang HY, Klatte M, Jakoby M, Baumlein H, Weisshaar B, Bauer P.** 2007. Iron deficiency-mediated stress regulation of four subgroup Ib BHLH genes in *Arabidopsis thaliana*. *Planta* **226**, 897-908.
